# Supplementary material for: Conservation of Imprinting and Methylation of MKRN3, MAGEL2 and NDN Genes in Cattle
Source: MDPI journal article supplement (doi:10.3390/ani11071985), 2021-07-02
Supplement: s1 [file s1]

### A PWS-IC DMR

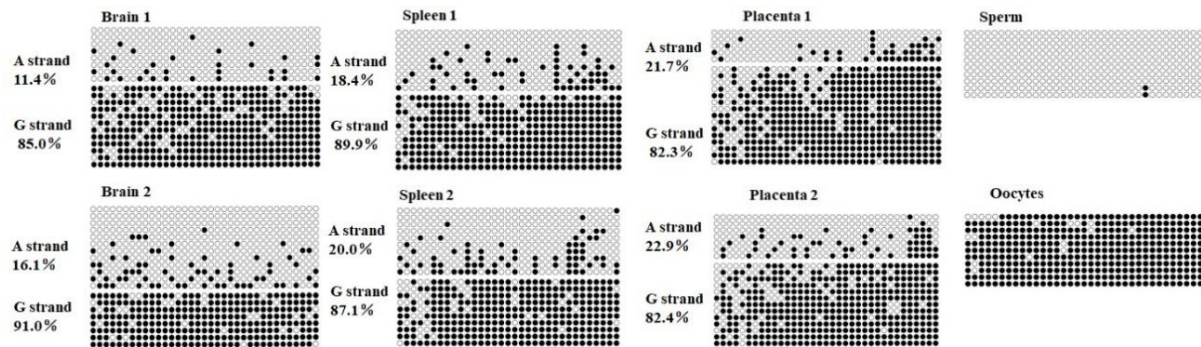

### B *MKRN3* DMR

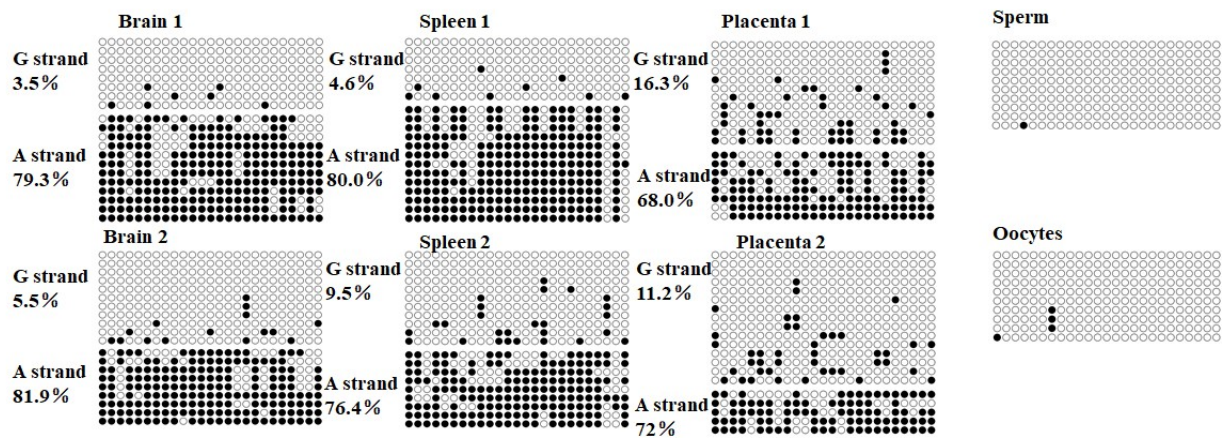

### C *NDN* DMR

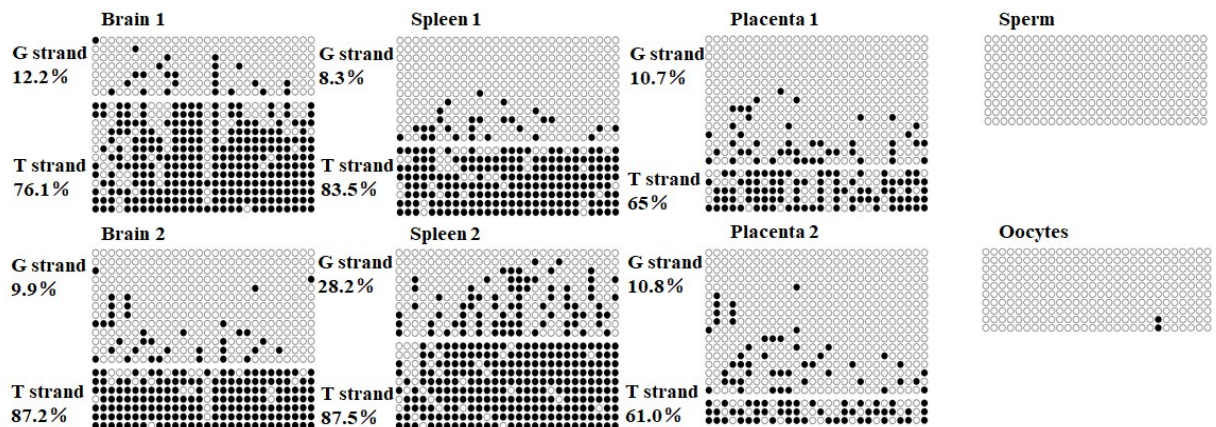

**Figure S1.** Methylation profiles of PWS-IC, *MKRN3* DMR and *NDN* DMR in bovine brain, spleen, placenta, sperms and oocytes. A: Methylation profiles of PWS-IC DMR. B: Methylation profiles of *MKRN3* DMR. C. Methylation profiles of *NDN* DMR. Methylated and unmethylated CpG dinucleotides are represented by filled and open circles, respectively.
